# Supplementary material
Source: Springer Nature journal article supplement (https://www.springermedizin.de/resource/supplementary/12986_2011_426_MOESM3_ESM.pdf/25656068)
Supplement: MOESM3 [file 25656068]

LA ↑↑↑

Ratio ↑↑  
LA : ALA

AA ↓  
Membrane + Plasma

CYP 2C9  
Leukotoxins  
Leukodiols

EPA ↓ - E series Resolvins ↓  
DHA ↓ - D series Resolvins ↓  
Protectins ↓  
Pro-inflam. Cytokines ↑

Lipoxins ↓ -  
No Stop signal  
PGD<sub>2</sub>+PGE<sub>2</sub> ↓ -  
No Eicosanoid Switch

ROS ↑ and AP ↑  
NFκB ↑  
Pro-Inflam. Cytokines ↑
